# Supplementary material for: Influence of the 2,5-bis(pentadecyloxy)terephthalic acid self-assembly layer on the structure and charge transfer properties of poly(p-phenylene vinylene) for application in organic solar cells
Source: Royal Society of Chemistry journal article supplement (doi:10.1039/d4nj04171b), 2024-11-19
Supplement: d4nj04171b1.pdf [file d4nj04171b1.pdf]

## Influence of 2,5-bis(pentadecyloxy)terephthalic acid self-assembly layer on the structure and charge transfer properties of poly(*p*-phenylene vinylene) for application in organic solar cell

Diana M. Bobrowska<sup>1\*</sup>, Katarzyna Gdula<sup>2</sup>, Joanna Breczko<sup>1</sup>, Jakub Goclon<sup>1</sup>, Marta E. Plonska-Brzezinska<sup>3</sup>, Krzysztof Winkler<sup>1\*</sup>

<sup>1</sup> Faculty of Chemistry, University of Białystok, Ciołkowskiego 1K, 15-245 Białystok, Poland

<sup>2</sup> Doctoral School of University of Białystok, Ciołkowskiego 1K, 15-245 Białystok, Poland

<sup>3</sup> Department of Organic Chemistry, Faculty of Pharmacy with the Division of Laboratory Medicine, Medical University of Białystok, Mickiewicza 2A, 15-222 Białystok, Poland

\*Corresponding authors: d.bobrowska@uwb.edu.pl; winkler@uwb.edu.pl

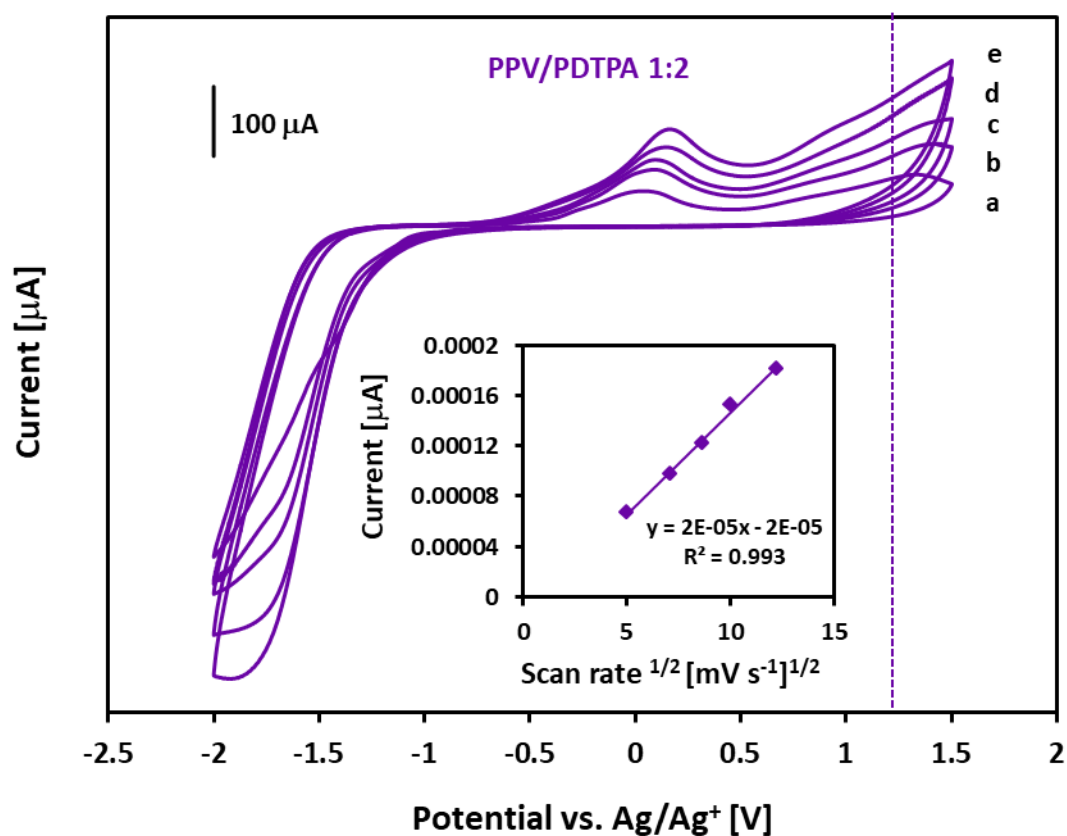

**Figure S1.** CV curves of ITO electrodes coated with PPV/PDTPA (1:2) recorded in acetonitrile containing 0.1 M TBAP at different scan rates: (a) 25 mV·s<sup>-1</sup>, (b) 50 mV·s<sup>-1</sup>, (c) 75 mV·s<sup>-1</sup>, (d) 100 mV·s<sup>-1</sup>, and (e) 150 mV·s<sup>-1</sup>. Inset: Linear relationship between the oxidation current at a potential of 1.2 V and the square root of the sweep rate.
